# Supplementary material for: tert-Butyl substituted hetero-donor TADF compounds for efficient solution-processed non-doped blue OLEDs
Source: Royal Society of Chemistry journal article supplement (doi:10.1039/d0tc00718h), 2020-01-01
Supplement: d0tc00718h1.pdf [file d0tc00718h1.pdf]

Electronic Supplementary Material (ESI) for Journal of Materials Chemistry C.

## Electronic Supplementary Information

### **Tert-butyl Substituted Hetero-donor TADF compounds for Efficient Solution-Processed Non-doped Blue OLEDs**

Feng-Ming Xie,<sup>†,a</sup> Zhi-Dong An,<sup>†,a</sup> Miao Xie,<sup>a</sup> Yan-Qing Li,<sup>\*,a,b</sup> Guang-Hui Zhang,<sup>a</sup> Shi-Jie Zou,<sup>a</sup> Li Chen,<sup>a</sup> Jing-De Chen,<sup>a</sup> Tao Cheng,<sup>\*,a</sup> and Jian-Xin Tang<sup>\*,a,c</sup>

<sup>a</sup> *Jiangsu Key Laboratory for Carbon-Based Functional Materials & Devices, Institute of Functional Nano & Soft Materials (FUNSOM), Soochow University, Suzhou, Jiangsu 215123, China*

<sup>b</sup> *School of Physics and Electronics Science, Ministry of Education Nanophotonics & Advanced Instrument Engineering Research Center, East China Normal University, Shanghai, 200062, China*

<sup>c</sup> *Institute of Organic Optoelectronics (IOO), JITRI, Wujiang, Suzhou 215215, China*

\* E-mail: [yqli@suda.edu.cn](mailto:yqli@suda.edu.cn) (Y.Q. Li), [tcheng@suda.edu.cn](mailto:tcheng@suda.edu.cn) (T. Cheng), [jxtang@suda.edu.cn](mailto:jxtang@suda.edu.cn) (J.X. Tang)

<sup>†</sup> These authors contribute equally to this work.

**2Cz2tCzBn:**  $^1\text{H}$  NMR (400 MHz,  $\text{CDCl}_3$ )  $\delta$  8.36 (s, 1H), 7.71-7.68 (m, 8H), 7.20 (d,  $J = 8.2$  Hz, 8H), 7.14 (dd,  $J = 8.6, 1.7$  Hz, 4H), 7.10-7.02 (m, 8H), 1.35 (s, 36H).  $^{13}\text{C}$  NMR (101 MHz,  $\text{CDCl}_3$ )  $\delta$  144.12, 139.33, 138.77, 137.46, 137.11, 135.72, 125.43, 124.50, 123.88, 123.14, 120.68, 119.86, 118.10, 116.16, 113.43, 109.59, 109.29, 34.59, 31.83. MS (APCI) calcd. for  $\text{C}_{71}\text{H}_{65}\text{N}_5$ :  $m/z = 987.52$ , found: 1005.6  $[\text{M}+18]^+$ .

**2PhCz2tCzBn:**  $^1\text{H}$  NMR (400 MHz,  $\text{CDCl}_3$ )  $\delta$  8.50 (s, 1H), 7.96 (s, 4H), 7.70 (s, 4H), 7.60 (d,  $J = 7.6$  Hz, 8H), 7.46 (t,  $J = 7.6$  Hz, 8H), 7.38-7.32 (m, 6H), 7.31 (s, 4H), 7.28 (d,  $J = 3.6$  Hz, 2H), 7.25 (s, 4H), 7.19 (dd,  $J = 8.7, 1.0$  Hz, 4H), 1.35 (s, 36H).  $^{13}\text{C}$  NMR (101 MHz,  $\text{CDCl}_3$ )  $\delta$  144.30, 141.52, 139.29, 138.82, 137.50, 136.79, 135.71, 134.44, 128.77, 127.16, 126.77, 125.12, 124.69, 124.57, 123.28, 118.37, 116.23, 109.74, 109.71, 34.62, 31.84. MS (APCI) calcd. for  $\text{C}_{95}\text{H}_{81}\text{N}_5$ :  $m/z = 1292.65$ , found: 1310.7  $[\text{M}+18]^+$ .

**2tCz2PhCzBn:**  $^1\text{H}$  NMR (400 MHz,  $\text{CDCl}_3$ )  $\delta$  8.49 (s, 1H), 7.98 (s, 4H), 7.71 (d,  $J = 1.5$  Hz, 4H), 7.61 (d,  $J = 7.4$  Hz, 8H), 7.47 (t,  $J = 7.6$  Hz, 8H), 7.41-7.33 (m, 13H), 7.23 (s, 1H), 7.21 (s, 2H), 7.14 (dd,  $J = 8.6, 1.7$  Hz, 4H), 1.35 (s, 36H).  $^{13}\text{C}$  NMR (101 MHz,  $\text{CDCl}_3$ )  $\delta$  144.13, 141.63, 139.01, 137.82, 137.34, 134.74, 128.74, 127.24, 126.73, 125.26, 125.02, 124.22, 123.26, 118.58, 116.12, 110.51, 108.93, 34.61, 31.82. MS (APCI) calcd. for  $\text{C}_{95}\text{H}_{81}\text{N}_5$ :  $m/z = 1292.65$ , found: 1310.7  $[\text{M}+18]^+$ .

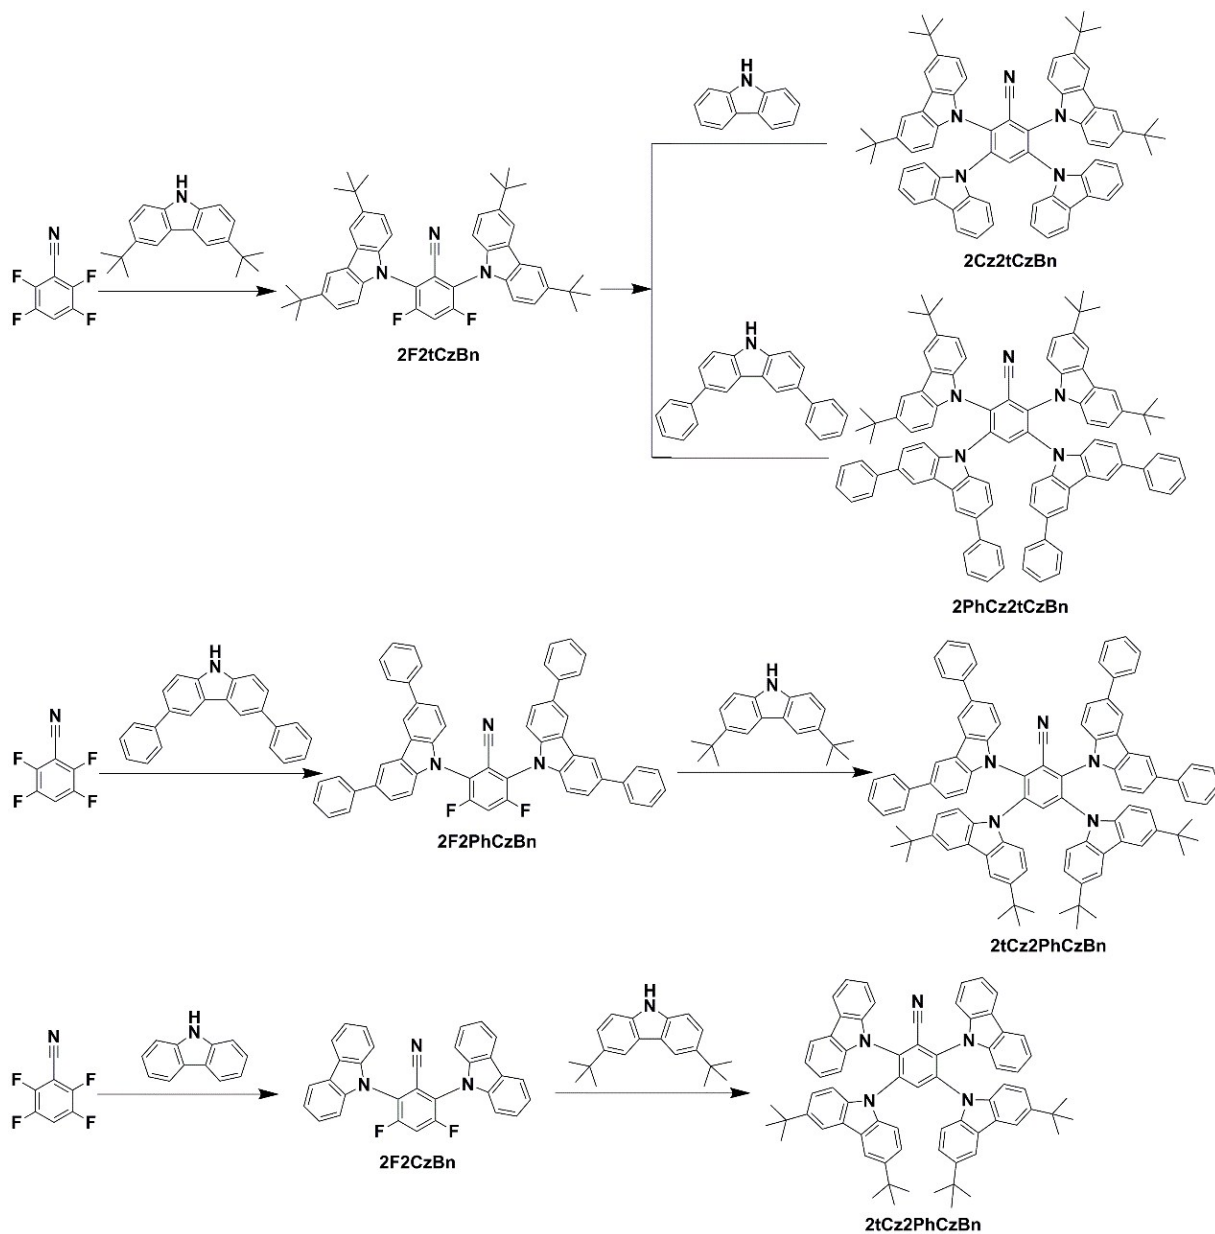

**Scheme S1.** Synthetic routes of **2Cz2tCzBn**, **2tCz2CzBn**, **2PhCz2tCzBn**, and **2tCz2PhCzBn**, respectively.

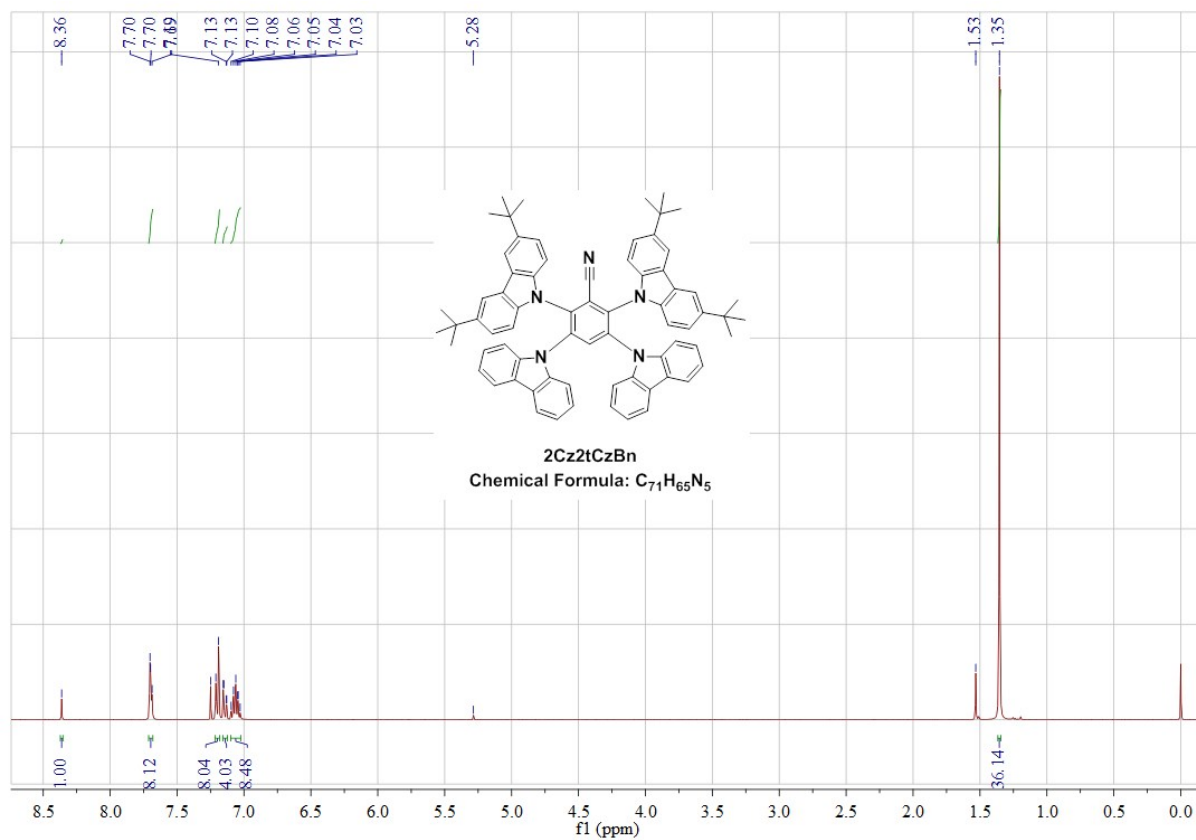

**Figure S1.** <sup>1</sup>H NMR spectrum of 2Cz2tCzBn.

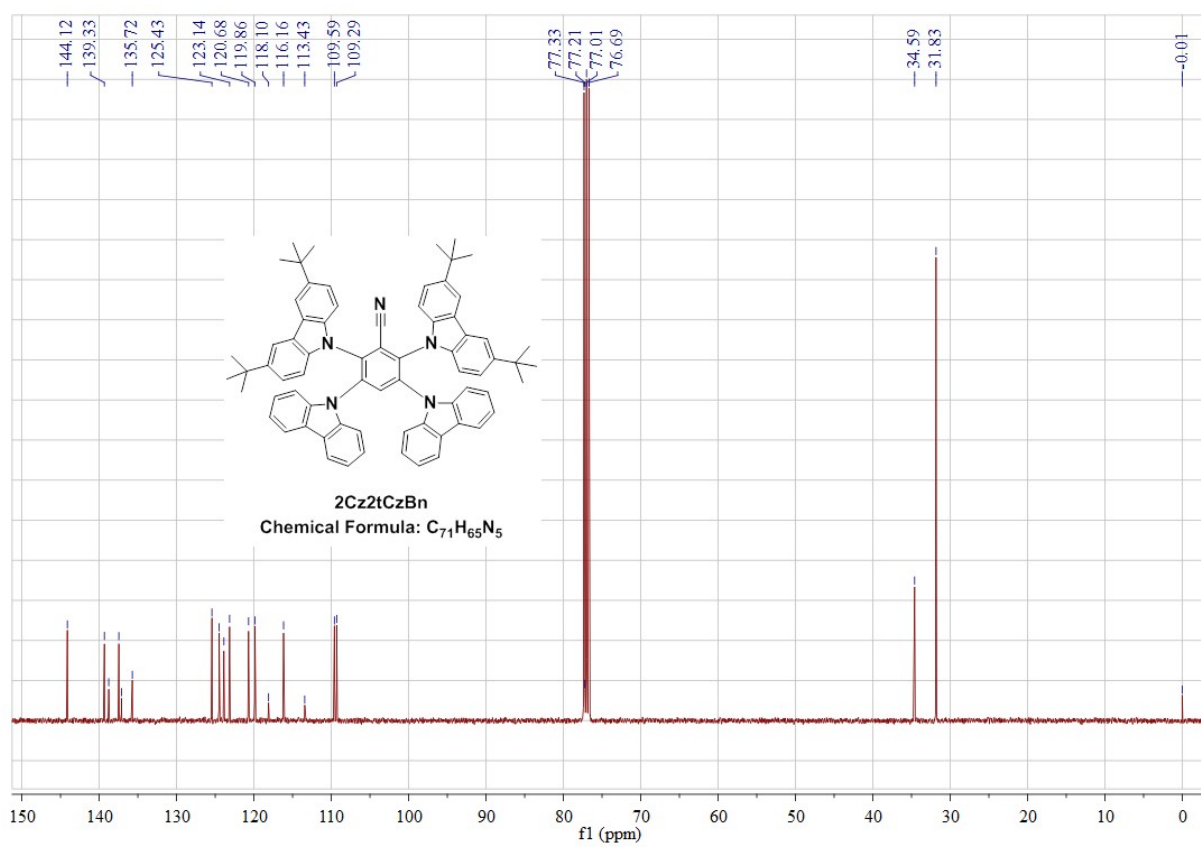

**Figure S2.**  $^{13}C$  NMR spectrum of 2Cz2tCzBn.

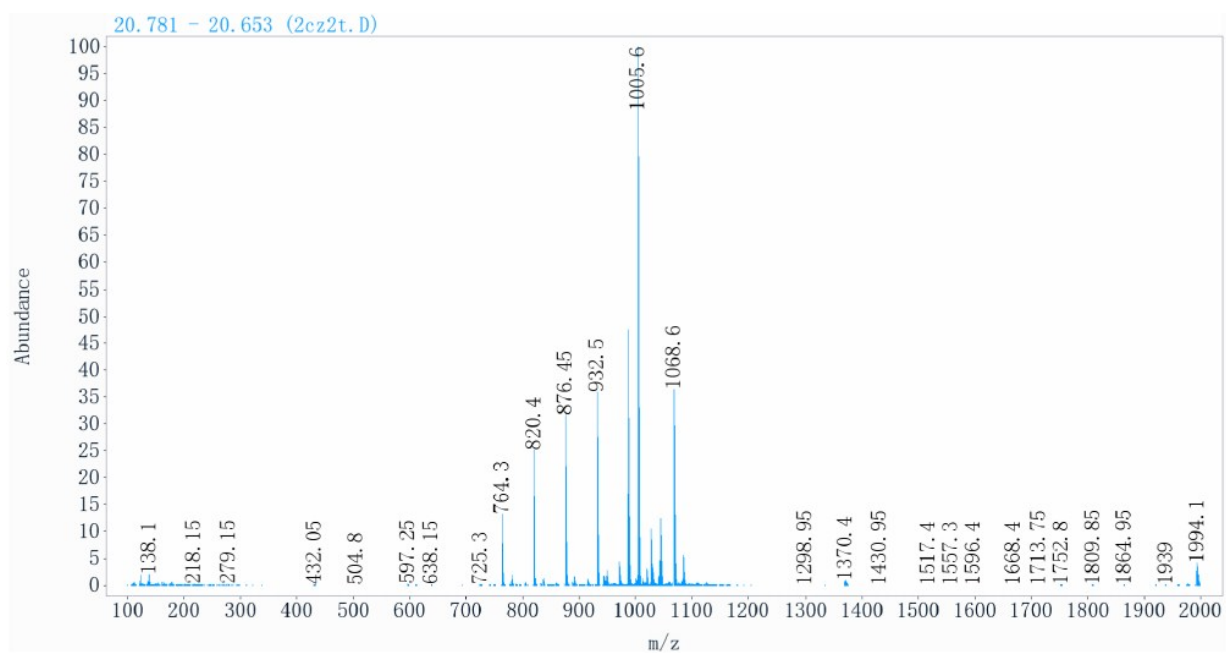

**Figure S3.** TOF-MS spectrum of 2Cz2tCzBn.

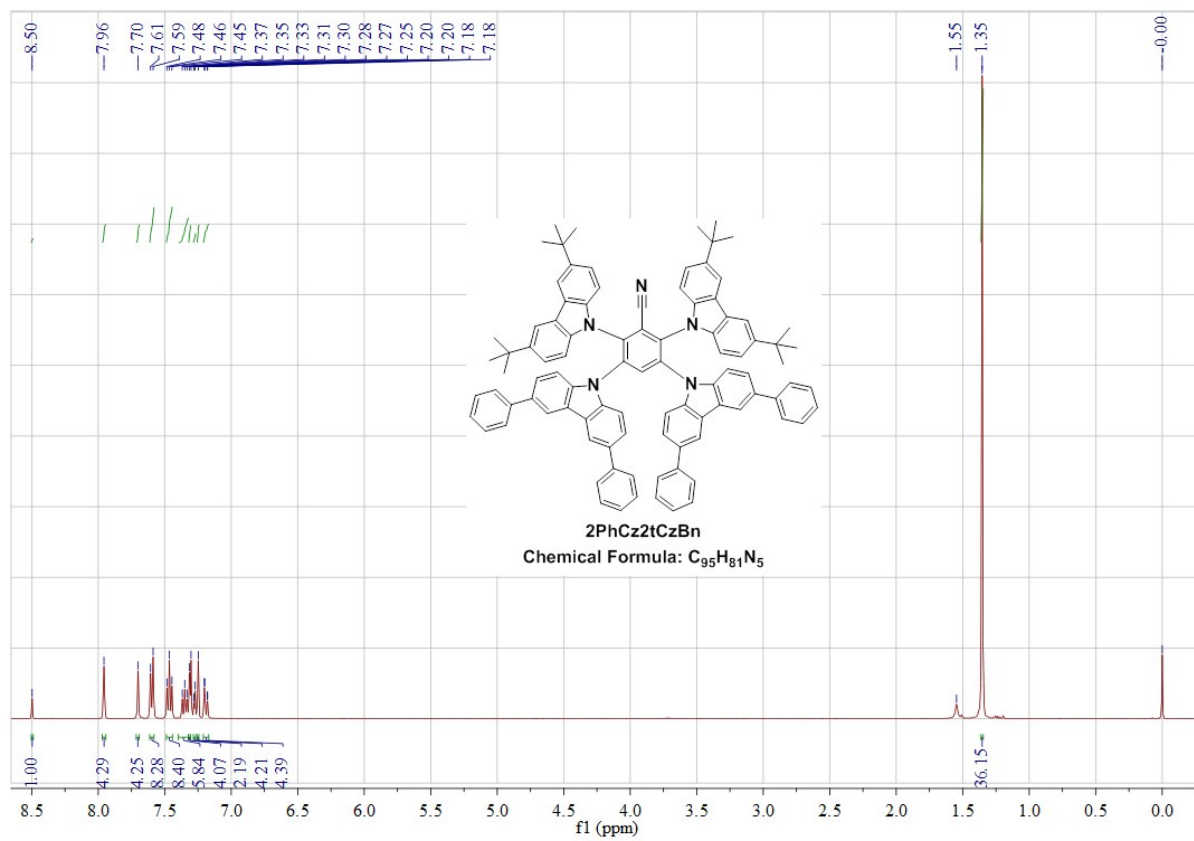

**Figure S4.**  $^1H$  NMR spectrum of 2PhCz2tCzBn.

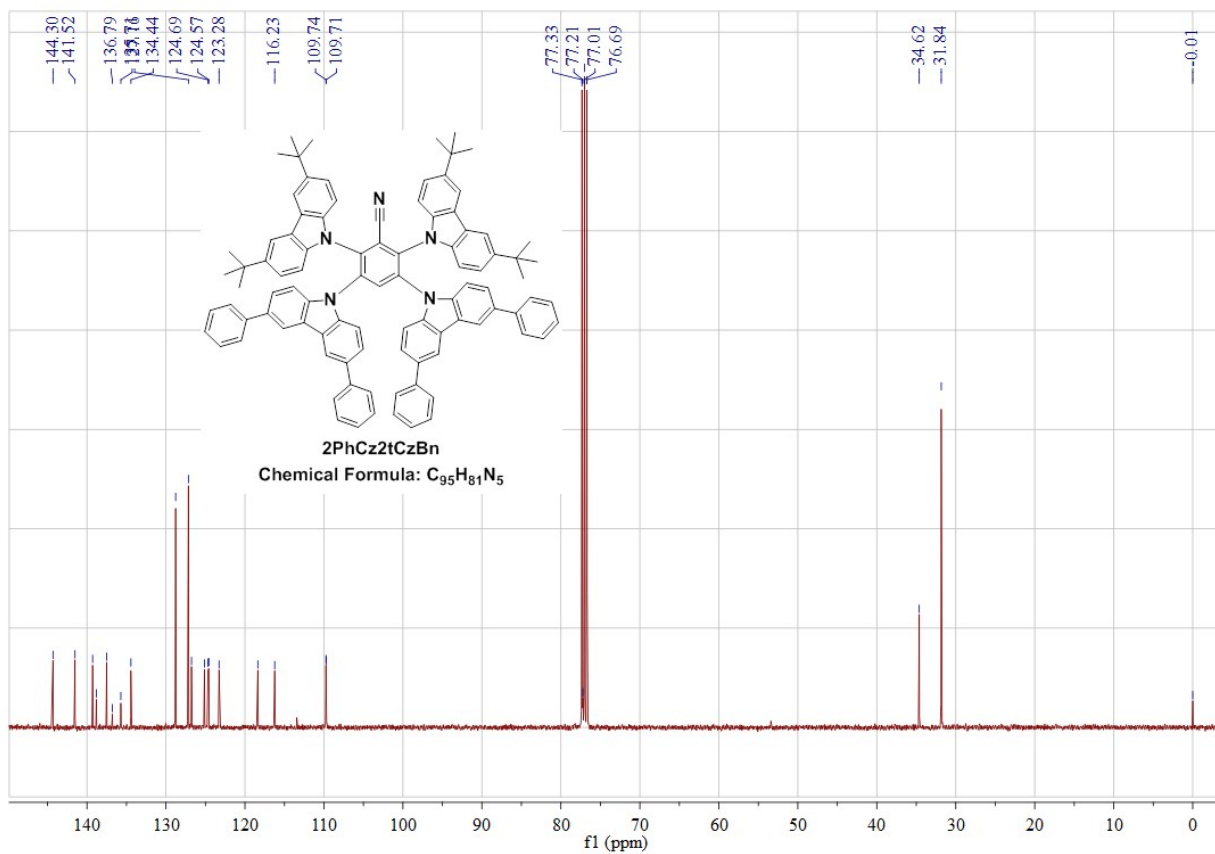

**Figure S5.** <sup>13</sup>C NMR spectrum of 2PhCz2tCzBn.



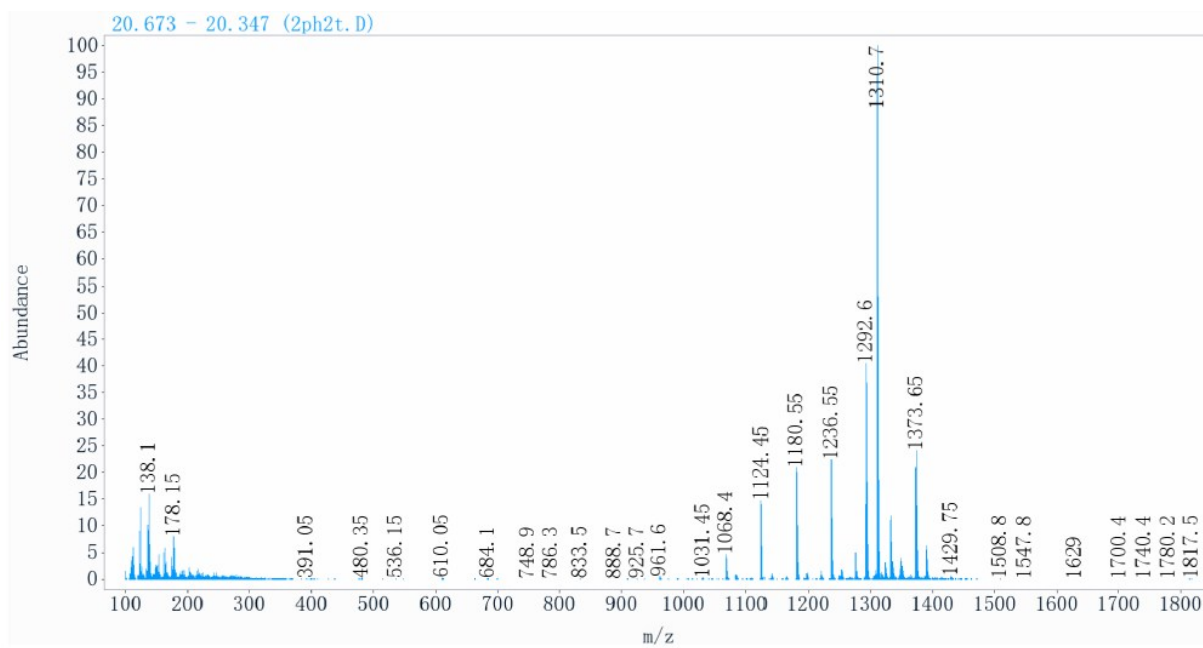

**Figure S6.** TOF-MS spectrum of 2PhCz2tCzBn.

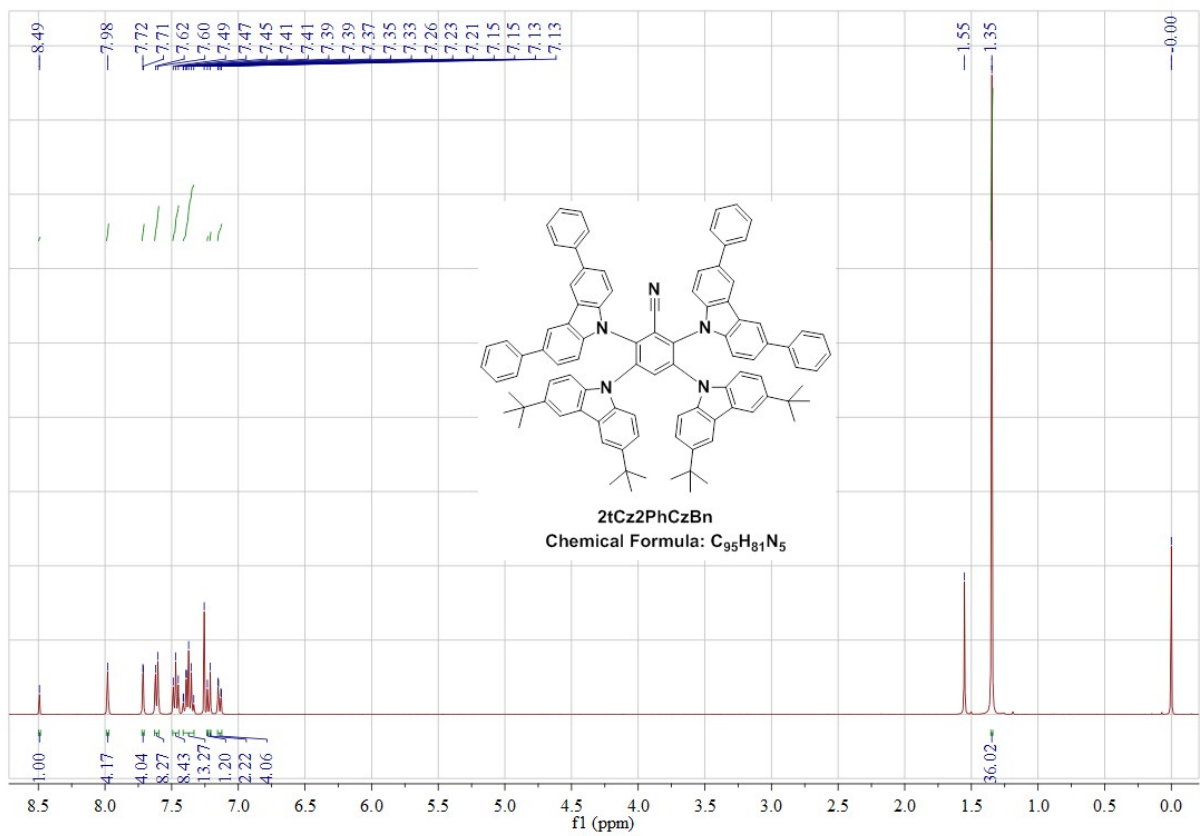

**Figure S7.**  $^1H$  NMR spectrum of 2tCz2PhCzBn.

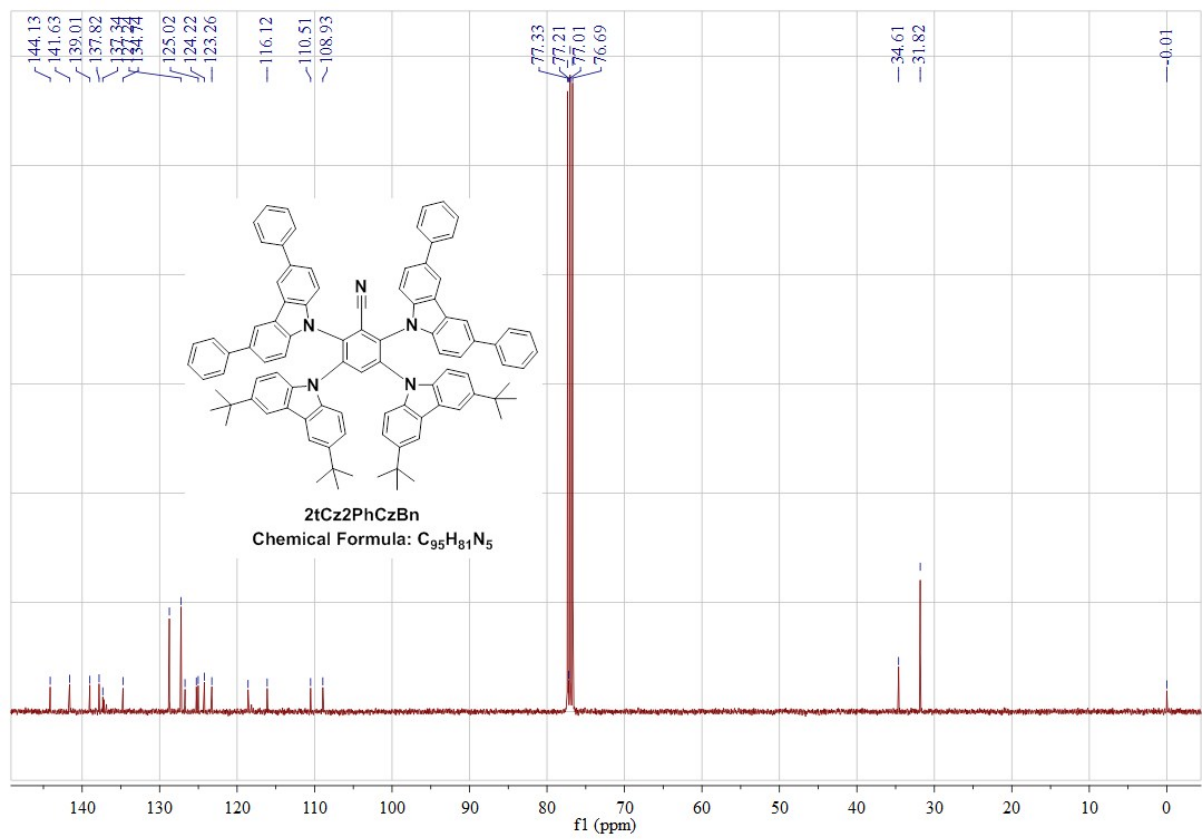

**Figure S8.**  $^{13}C$  NMR spectrum of 2tCz2PhCzBn.

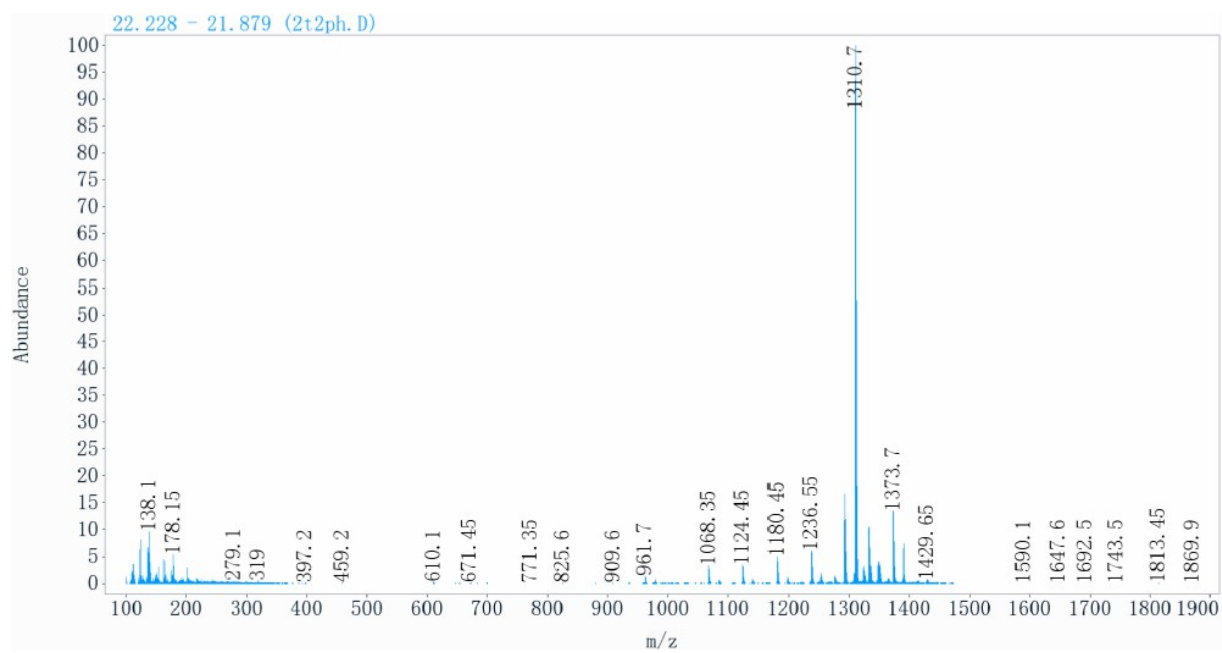

**Figure S9.** TOF-MS spectrum of 2tCz2PhCzBn.

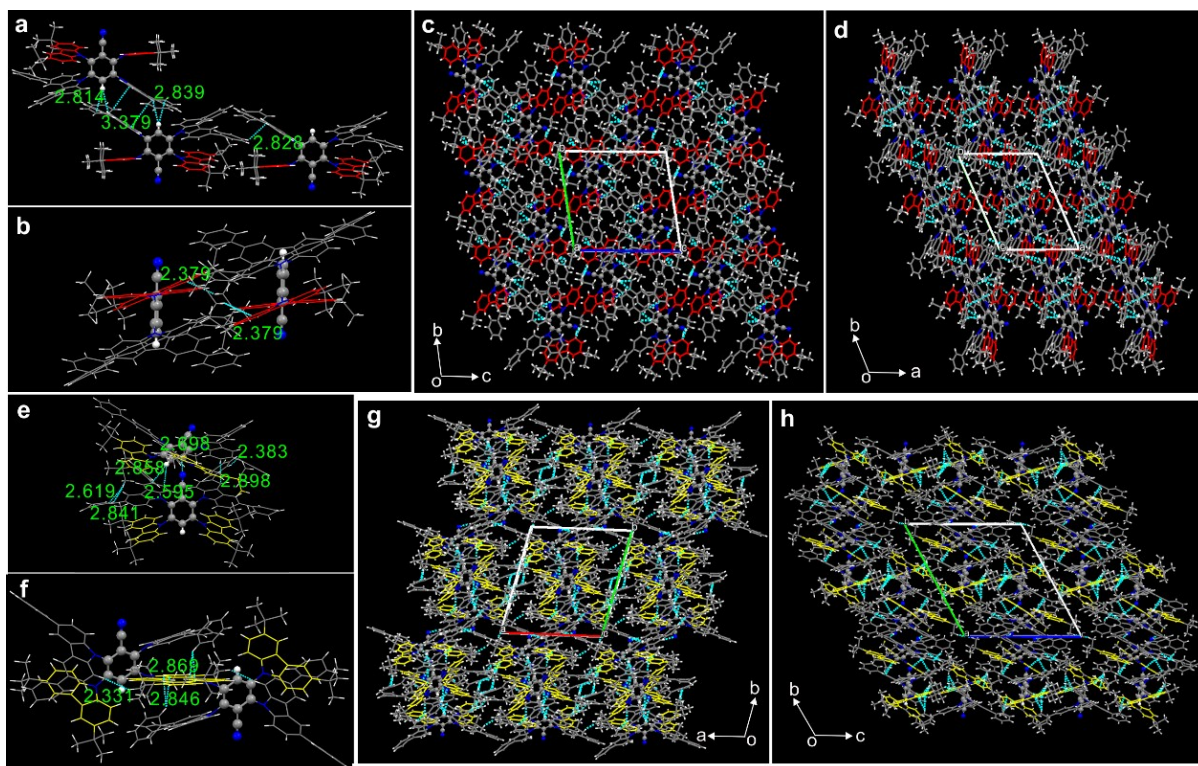

**Figure S10.** Single-crystal structures and molecular packing with selected intermolecular distances of (a-d) **2PhCz2tCzBn** and (e-h) **2tCz2PhCzBn**.

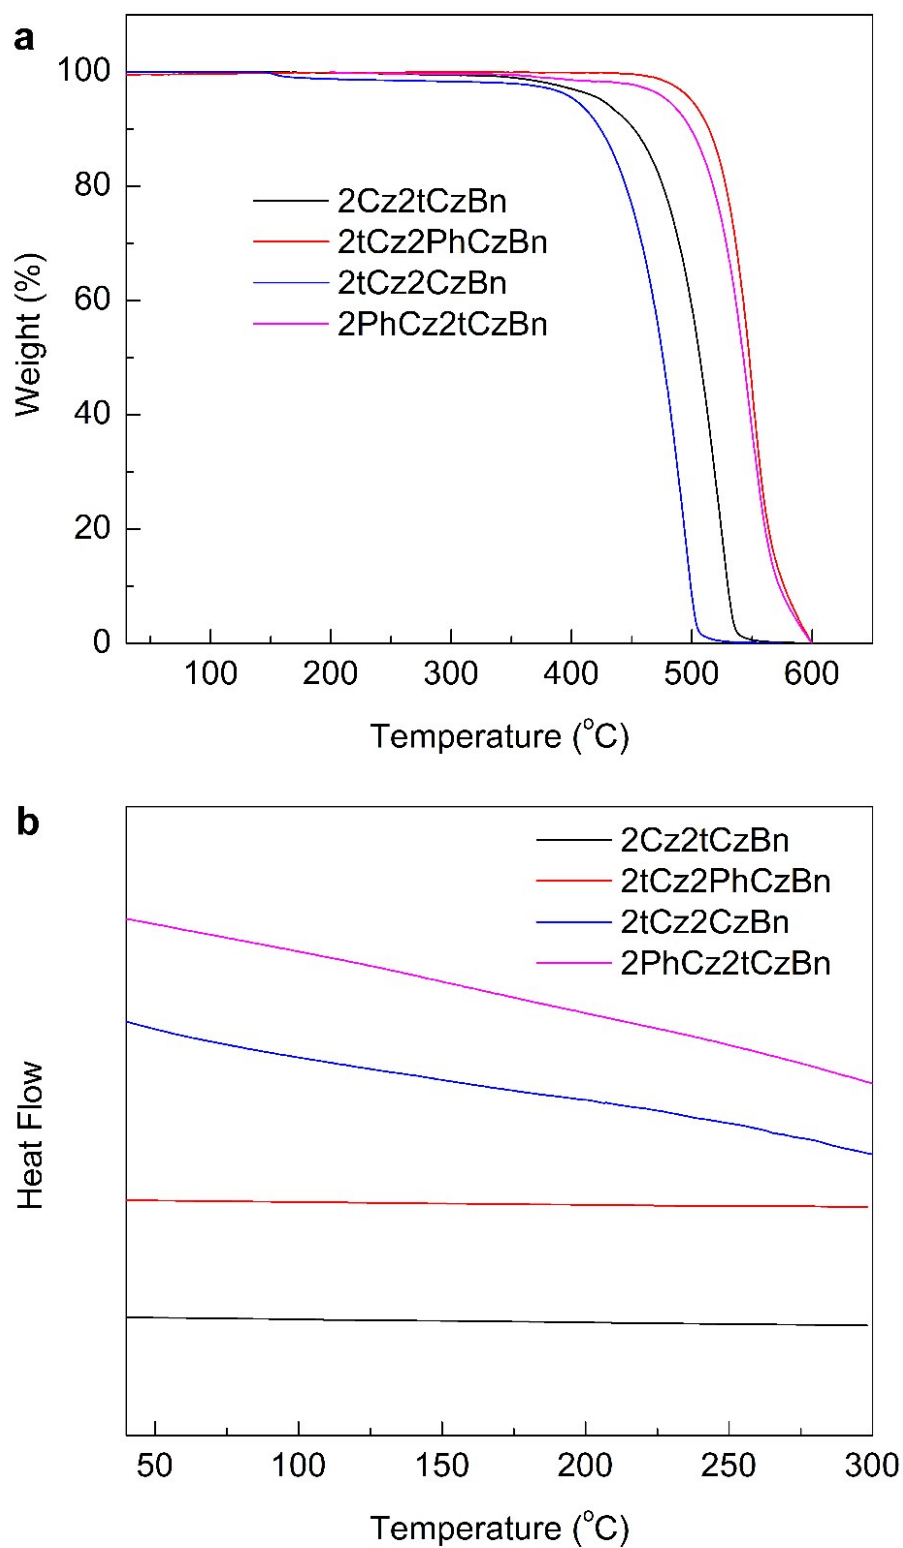

**Figure S11.** (a) TGA and (b) DSC curves of **2Cz2tCzBn**, **2tCz2CzBn**, **2PhCz2tCzBn**, and **2tCz2PhCzBn**.

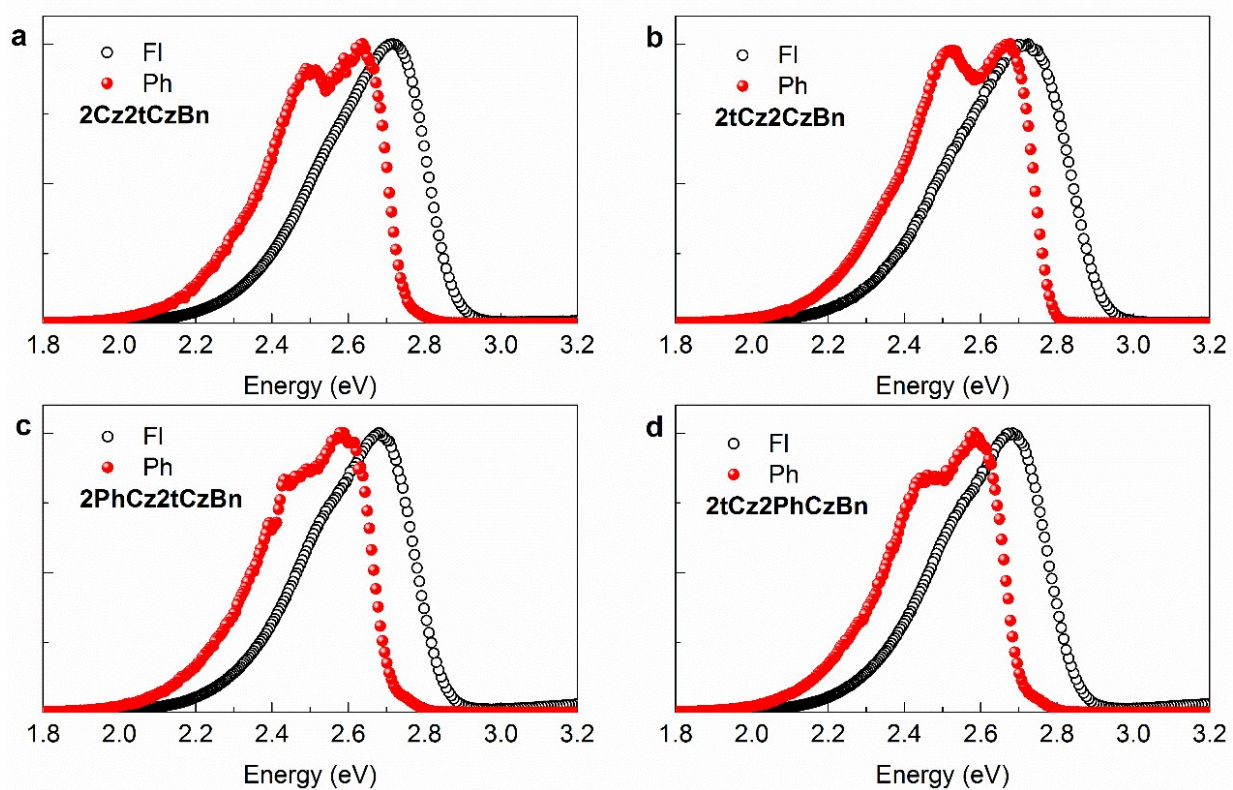

**Figure S 12.** Room-temperature fluorescence and low-temperature phosphorescence (at 77 K) spectra of **2Cz2tCzBn**, **2tCz2CzBn**, **2PhCz2tCzBn**, and **2tCz2PhCzBn**. The  $\Delta E_{ST}$  values are estimated from the difference in the threshold energies of two spectra.

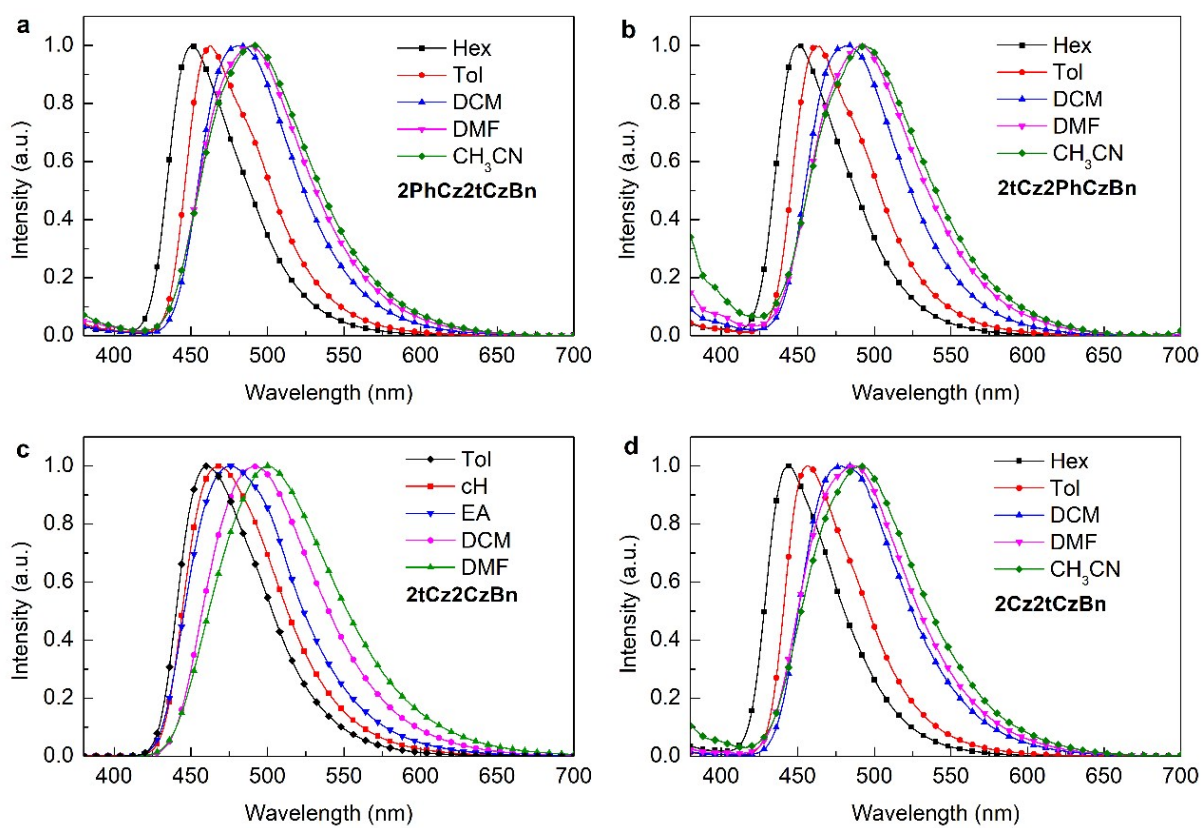

**Figure S13.** PL spectra of (a) **2PhCz2tCzBn**, (b) **2tCz2PhCzBn**, (c) **2tCz2CzBn**, and (d) **2Cz2tCzBn** in different solvents.



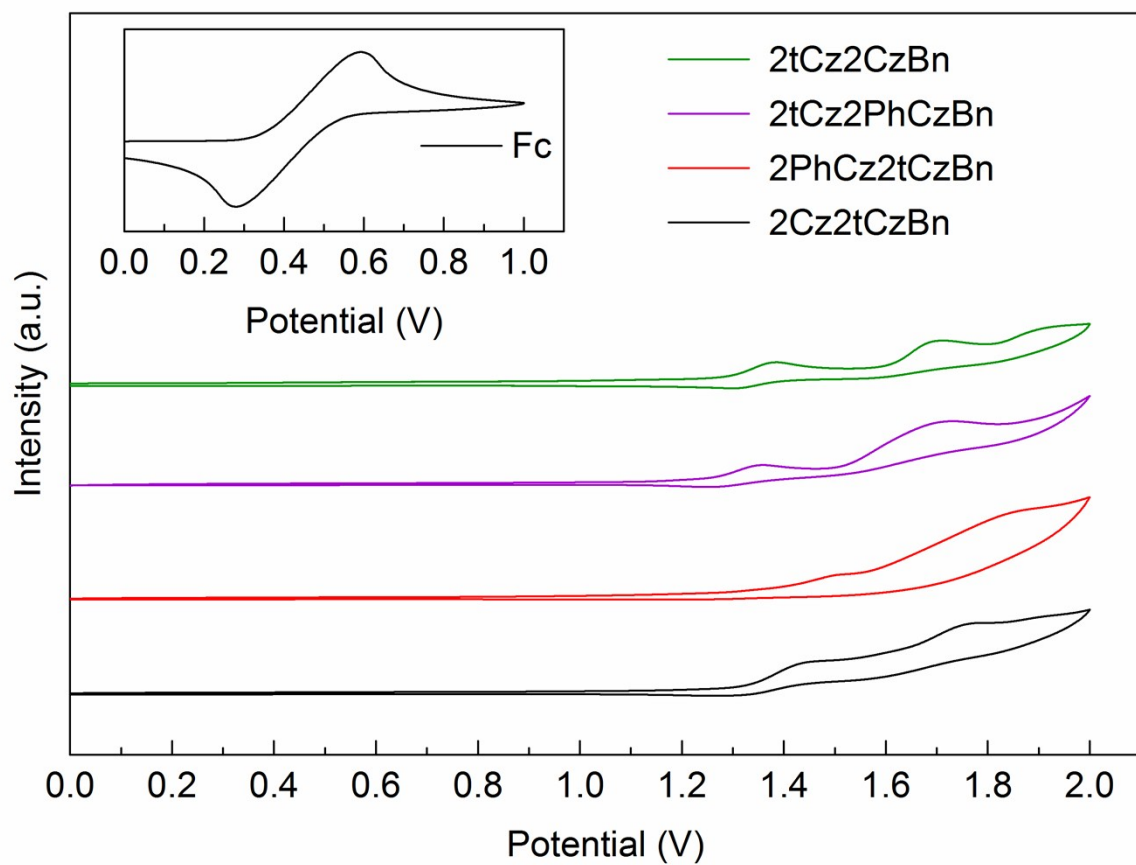

**Figure S14.** Cyclic voltammograms of **2Cz2tCzBn**, **2tCz2CzBn**, **2PhCz2tCzBn**, and **2tCz2PhCzBn** in DCM solution ( $10^{-5}$  M).

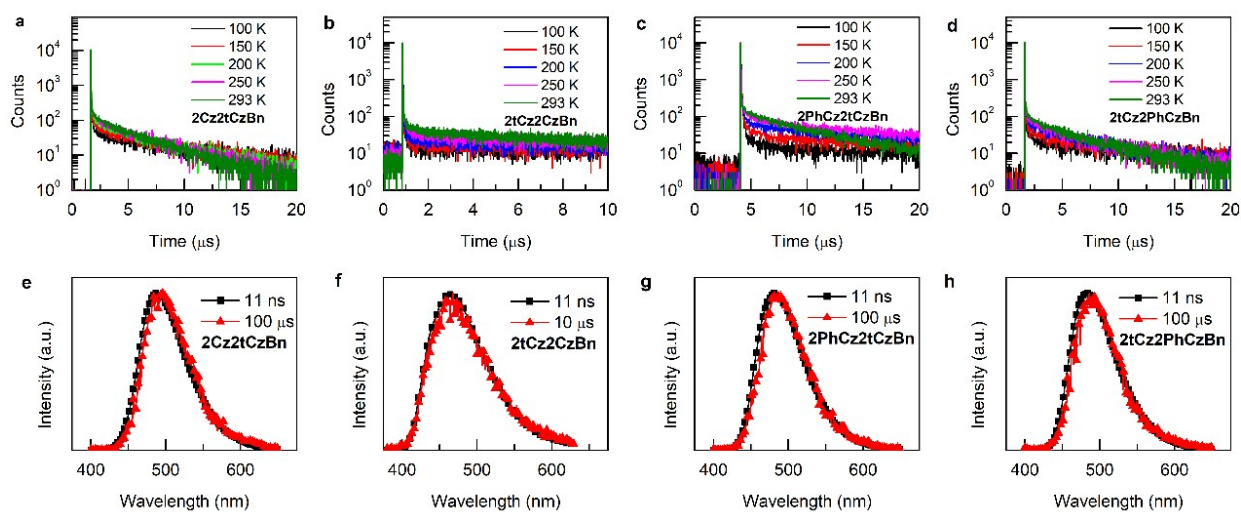

**Figure S15.** (a-d) Temperature-dependent transient PL decay curves of (a) **2Cz2tCzBn**, (b) **2tCz2CzBn**, (c) **2PhCz2tCzBn**, and (d) **2tCz2PhCzBn** in neat films at temperatures ranging from 100 K to 293 K. (e-h) Prompt and delayed emission spectra of (e) **2Cz2tCzBn**, (f) **2tCz2CzBn**, (g) **2PhCz2tCzBn**, and (h) **2tCz2PhCzBn**.

**Table S1.** Photophysical characteristics of four compounds in neat films.

| Films              | $\tau_p$ | $\tau_d$   | PLQY/ $\Phi_p/\Phi_d$ | $k_r$                     | $k_{ISC}$                 | $k_{RISC}$                |
|--------------------|----------|------------|-----------------------|---------------------------|---------------------------|---------------------------|
|                    | [ns]     | [ $\mu$ s] | [%]                   | [ $10^7 \text{ s}^{-1}$ ] | [ $10^7 \text{ s}^{-1}$ ] | [ $10^5 \text{ s}^{-1}$ ] |
| <b>2Cz2tCzBn</b>   | 26       | 3.9        | 78/42/36              | 1.6                       | 1.8                       | 4.7                       |
| <b>2tCz2CzBn</b>   | 10       | 15.7       | 66/31/35              | 2.0                       | 3.1                       | 3.4                       |
| <b>2PhCz2tCzBn</b> | 16       | 5.7        | 55/27/28              | 1.6                       | 3.2                       | 3.3                       |
| <b>2tCz2PhCzBn</b> | 16       | 5.6        | 53/28/25              | 1.7                       | 3.0                       | 4.2                       |

<sup>1</sup> Radiative rate constants of  $S_1$ ,  $k_r = \Phi_p/\tau_p + \Phi_d/\tau_d$ .

<sup>2</sup> Nonradiative rate constants of  $S_1$ ,  $k_{nr} = k_r(1 - \Phi_{PL})/\Phi_{PL}$ .

<sup>3</sup> Rate constants for ISC ( $S_1 \rightarrow T_1$ ),  $k_{ISC} = k_p - k_r - k_{nr}$ .

<sup>4</sup> Rate constants for RISC ( $T_1 \rightarrow S_1$ ),  $k_{RISC} = k_p k_d / k_{ISC} \cdot \Phi_d / \Phi_p$ .

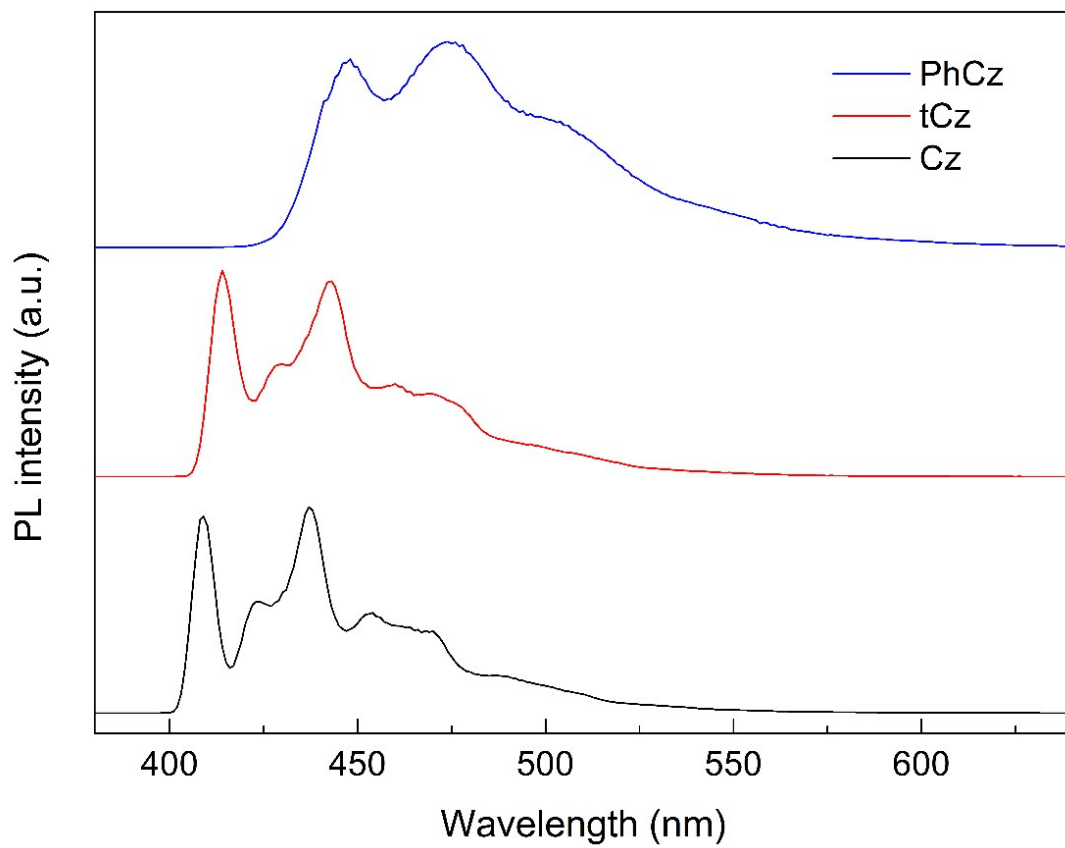

**Figure S16.** Phosphorescence spectra of Cz, tCz and PhCz in toluene at 77 K.

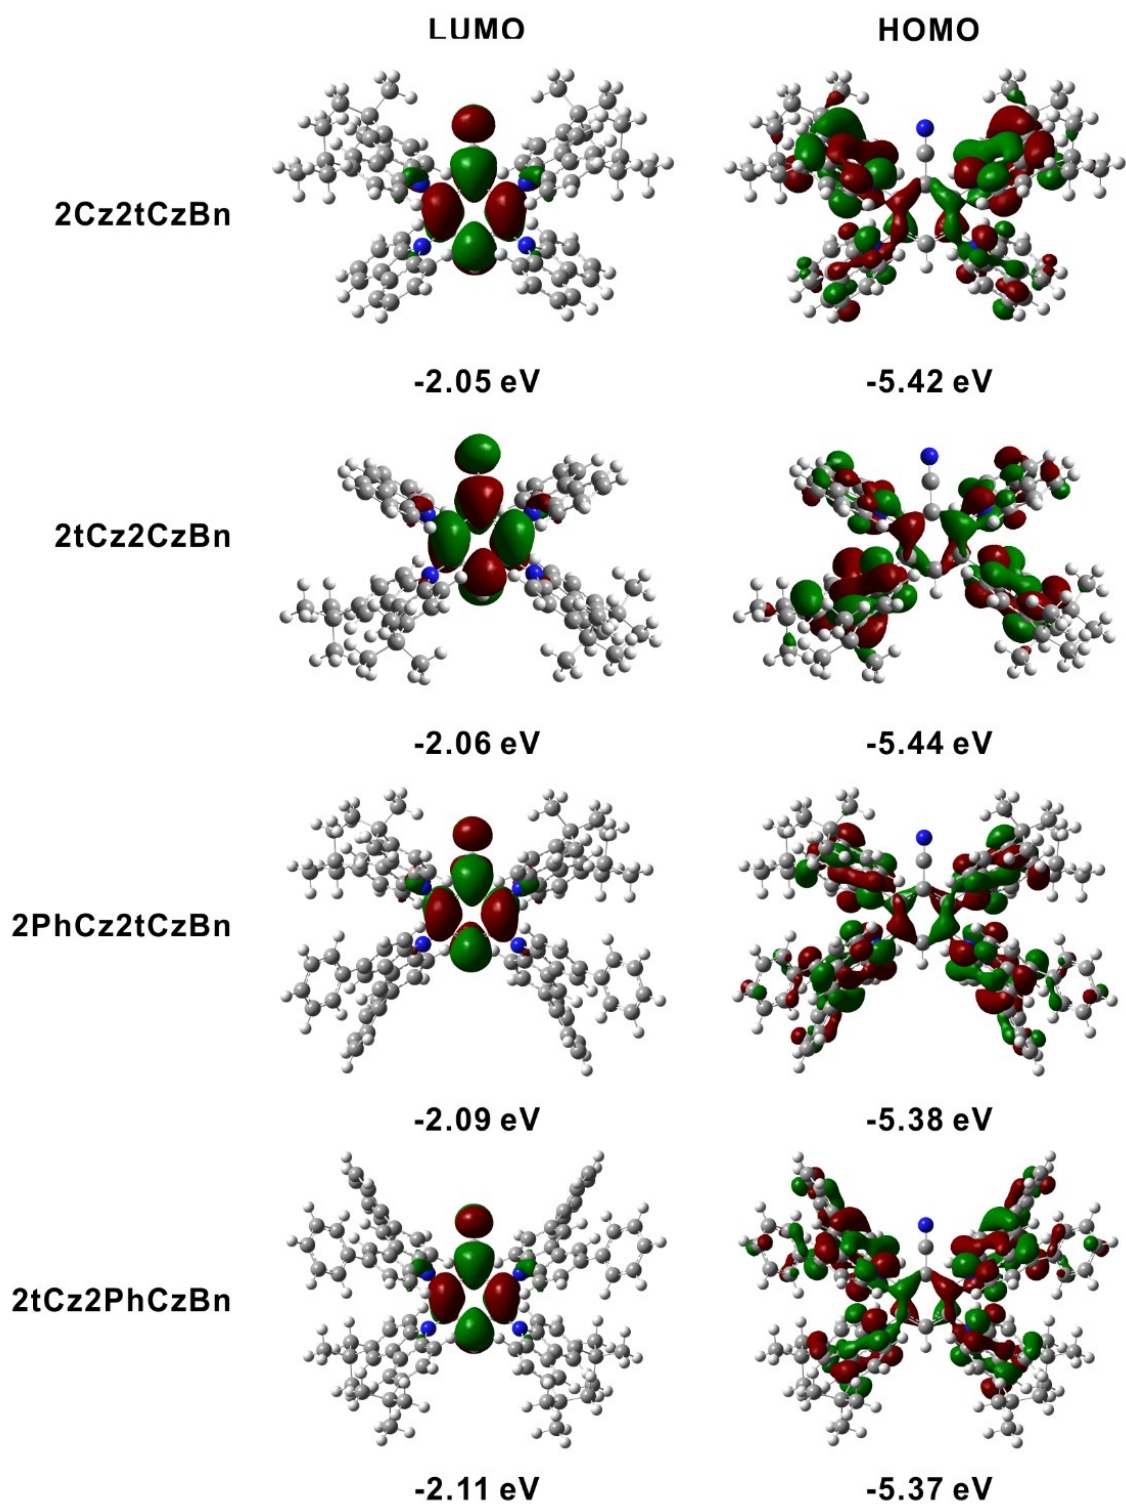

**Figure S17.** Calculated LUMO and HOMO distributions and energy levels of **2Cz2tCzBn**, **2tCz2CzBn**, **2PhCz2tCzBn**, and **2tCz2PhCzBn**.

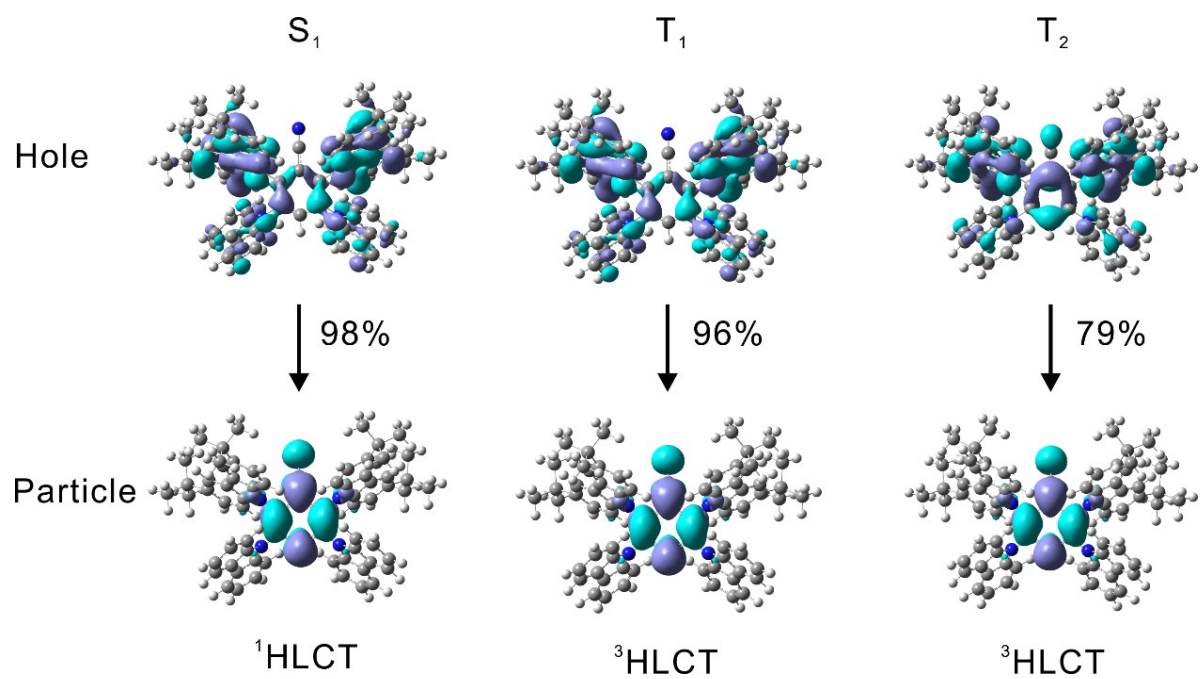

**Figure S18.** Natural transition orbital (NTO) analysis for **2Cz2tCzBn**.

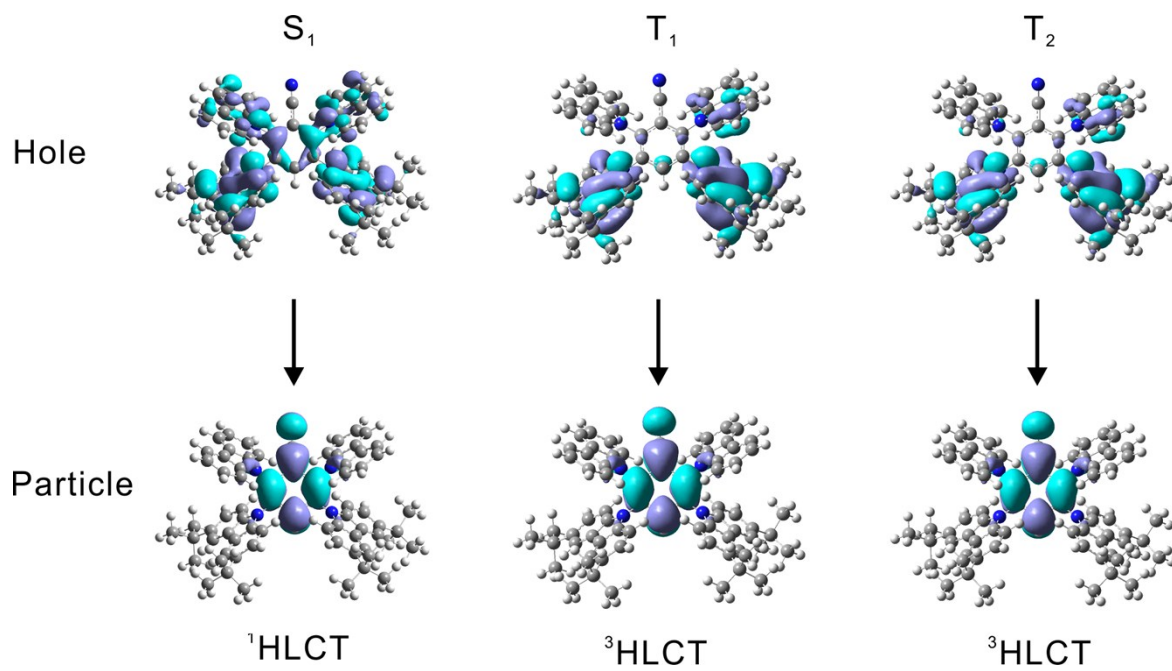

**Figure S19.** Natural transition orbital (NTO) analysis for **2tCz2CzBn**.

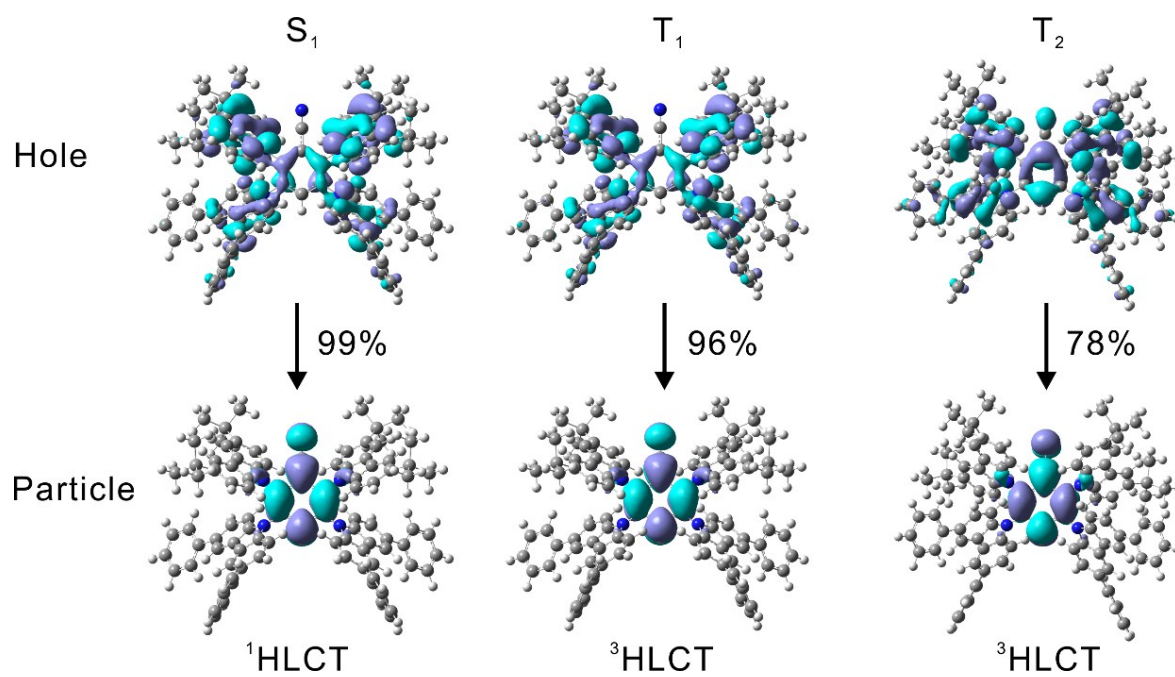

**Figure S20.** Natural transition orbital (NTO) analysis for **2PhCz2tCzBn**.



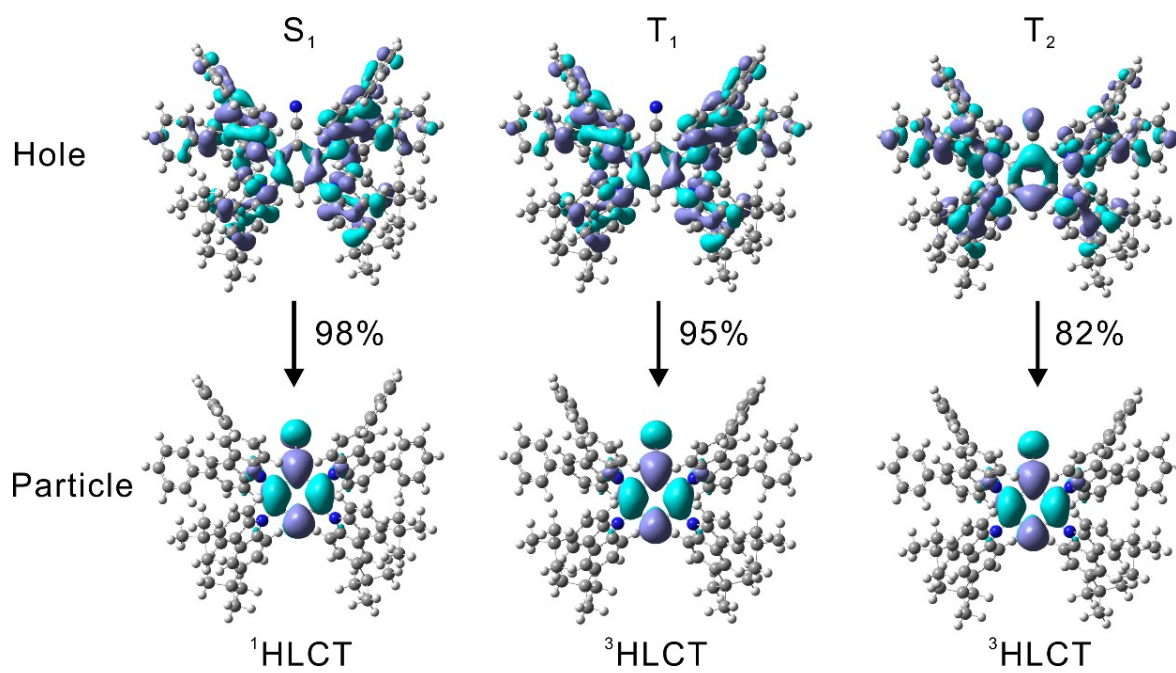

**Figure S21.** Natural transition orbital (NTO) analysis for **2tCz2PhCzBn**.

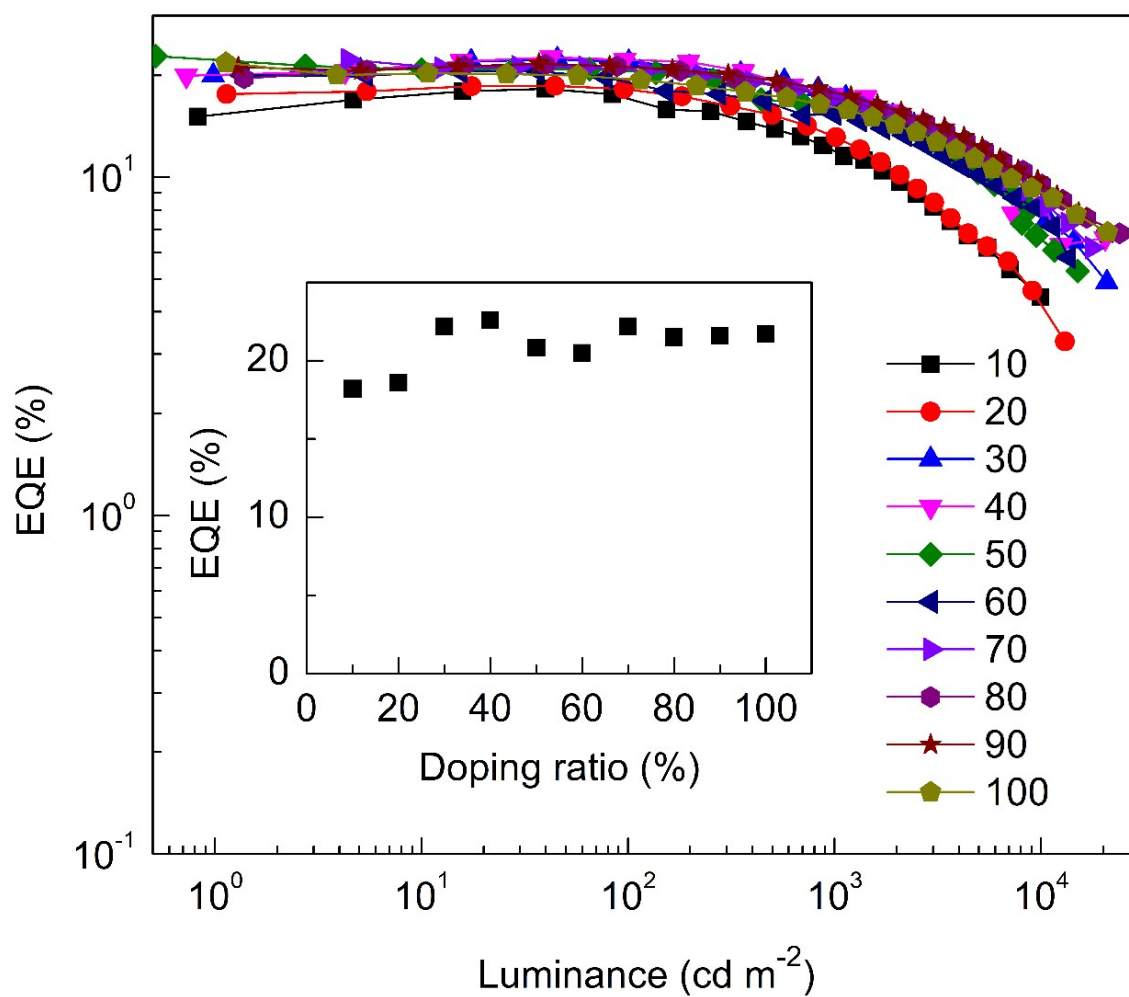

**Figure S22.** EQE evolution of blue OLEDs based on **2Cz2tCzBn** with varied doping concentrations from 10 to 100 wt%. Device structure: ITO/HATCN (10 nm)/TAPC (40 nm)/mCP (10 nm)/mCP:**2Cz2tCzBn** (x wt%, 30 nm)/PO-T2T (50 nm)/LiF (1 nm)/Al (100 nm).

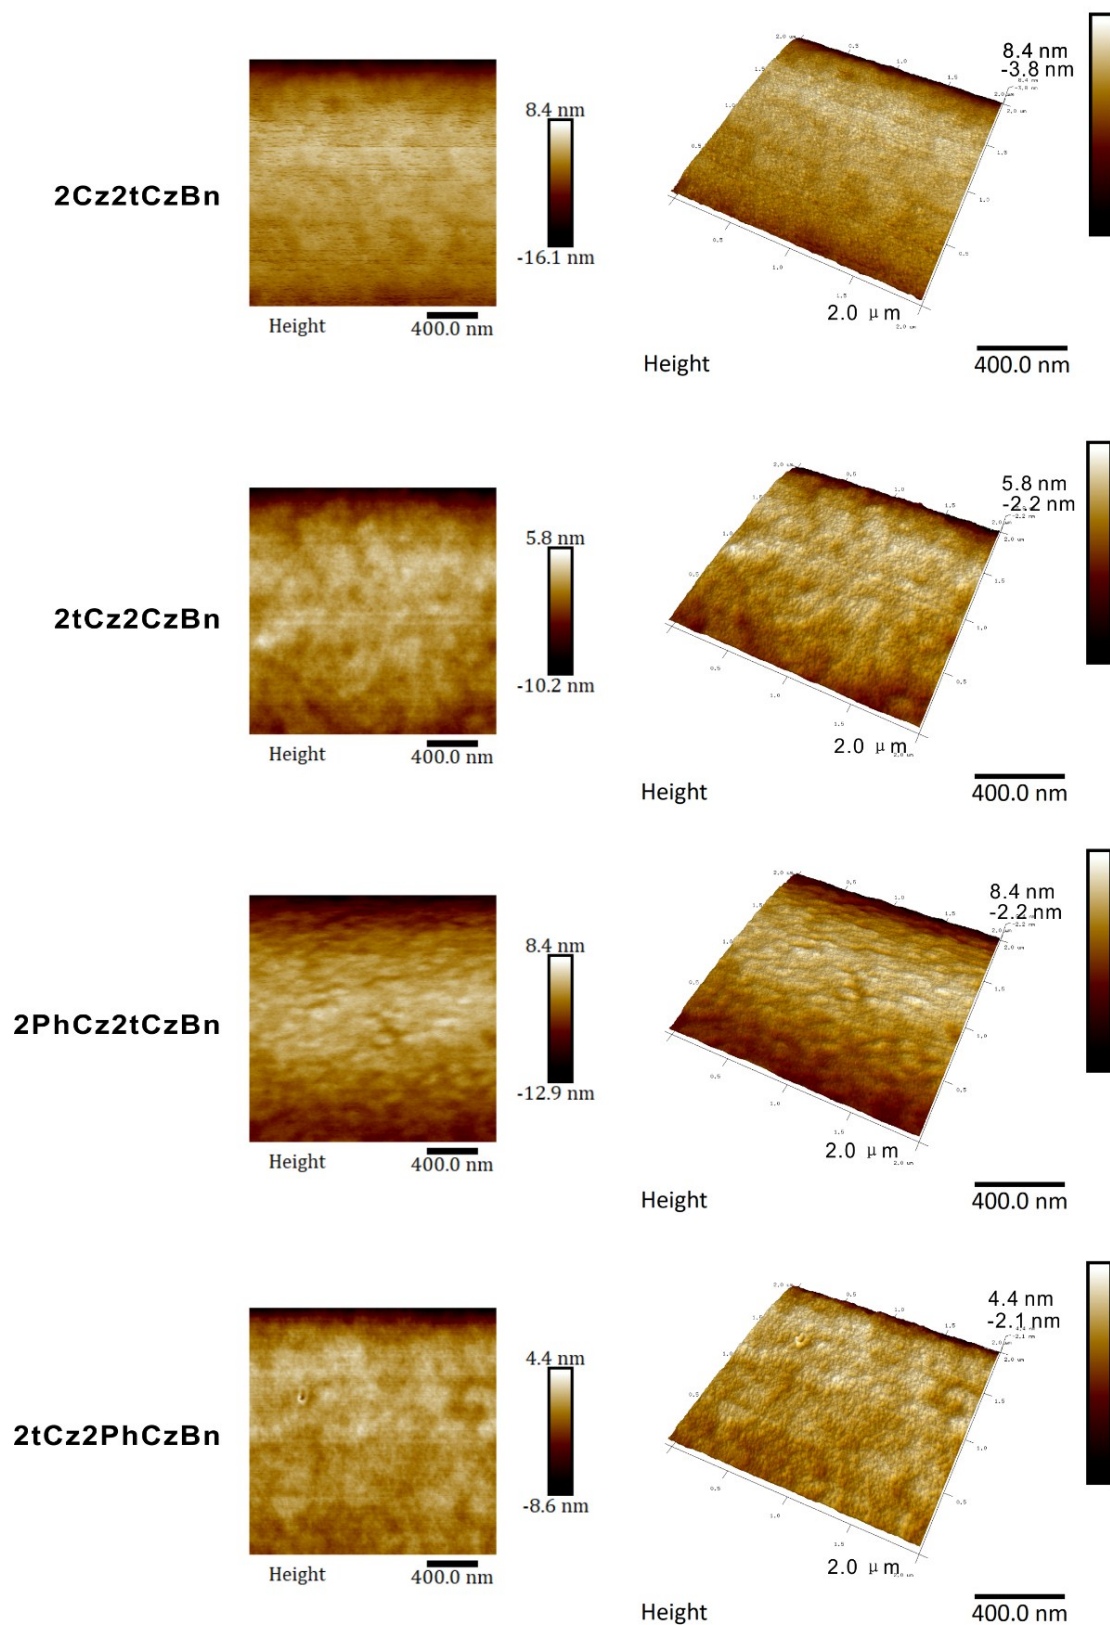

**Figure S23.** AFM images of solution-processed TADF thin films on PVK substrates for (a) **2Cz2tCzBn**, (b) **2tCz2CzBn**, (c) **2PhCz2tCzBn**, and (d) **2tCz2PhCzBn**, respectively.

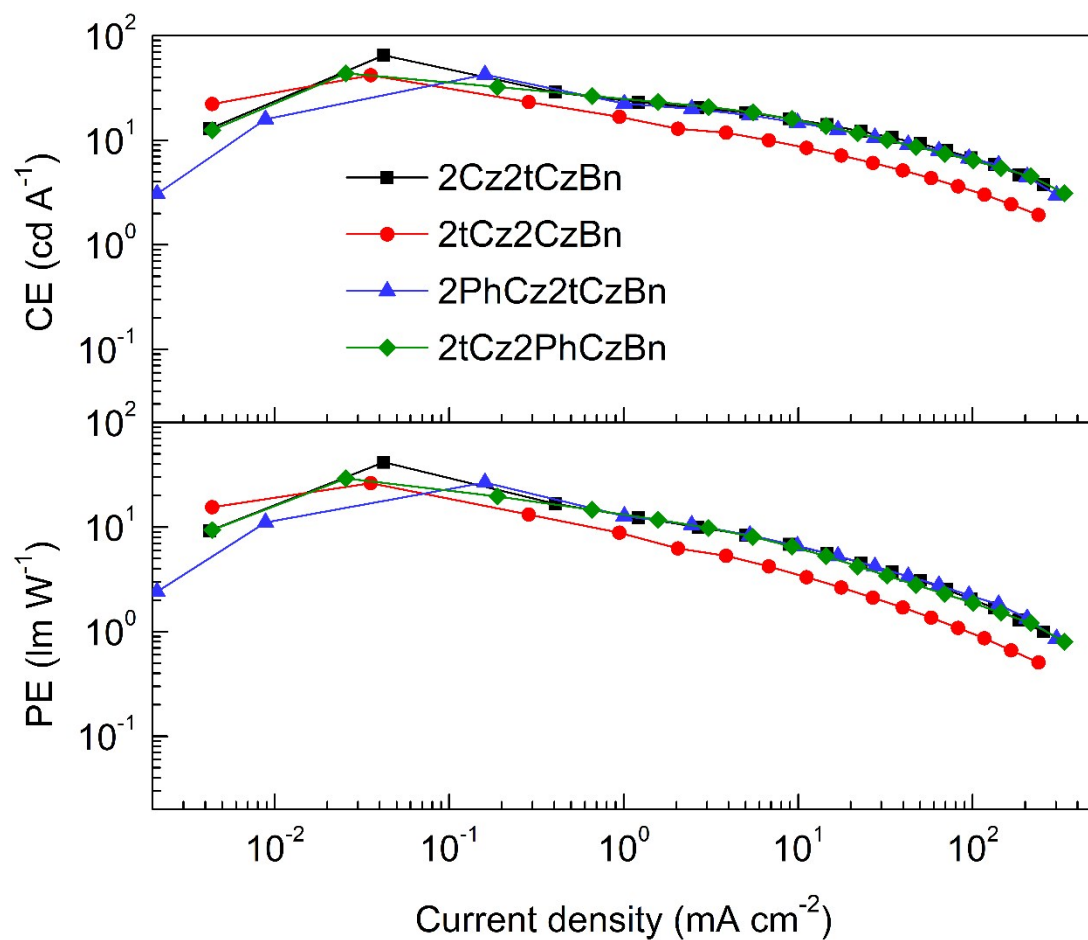

**Figure S24.** Current efficiency (CE) and power efficiency (PE) as a function of current density for solution-processed non-doped blue OLEDs using **2Cz2tCzBn**, **2tCz2CzBn**, **2PhCz2tCzBn**, and **2tCz2PhCzBn**, respectively.

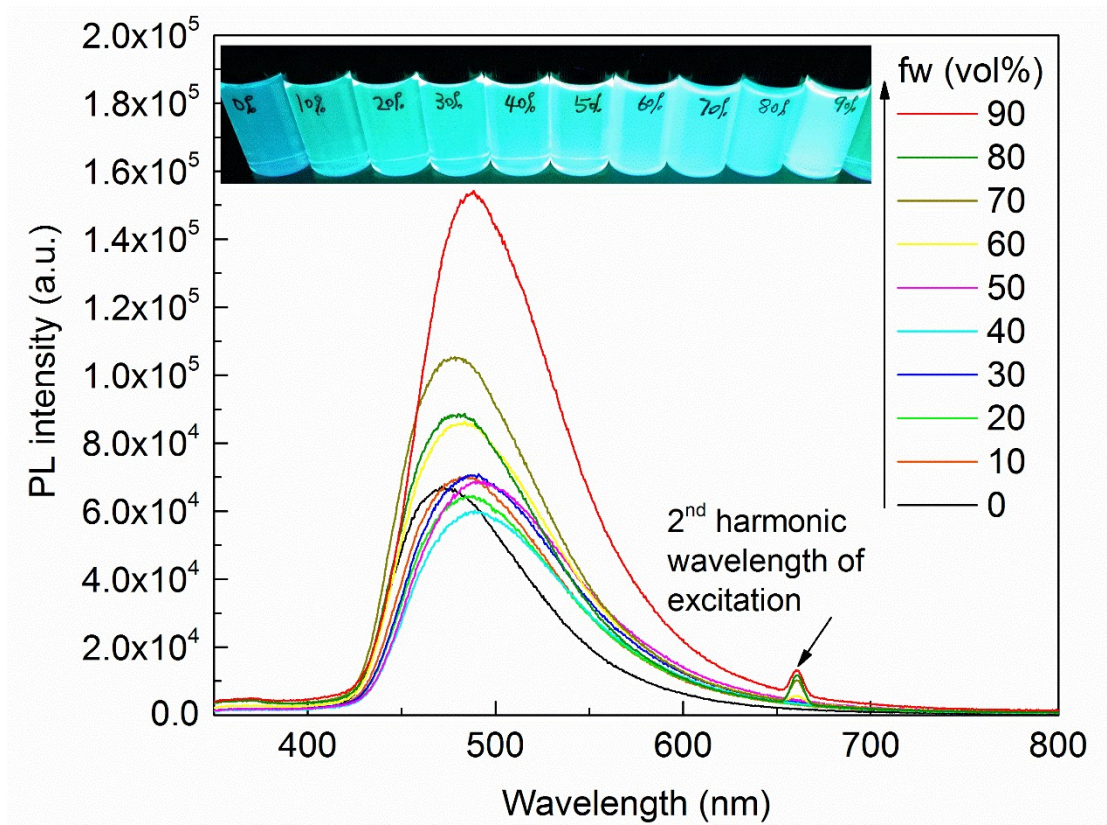

**Figure S25.** PL emission of 2Cz2tCzBn in in THF/water mixtures with different water fractions ( $f_w$ ).

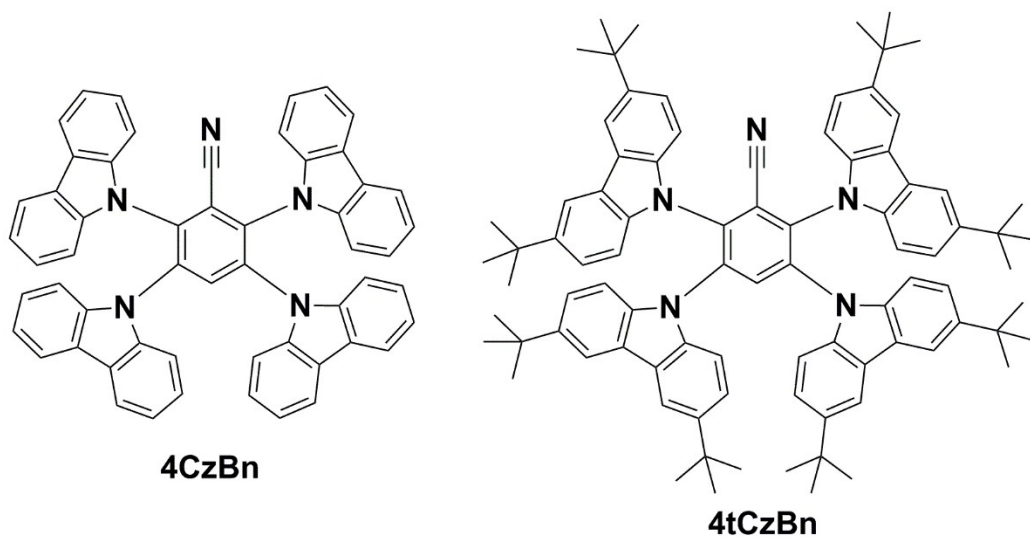

**Scheme S2.** Chemical structures of 4CzBn and 4tCzBn.

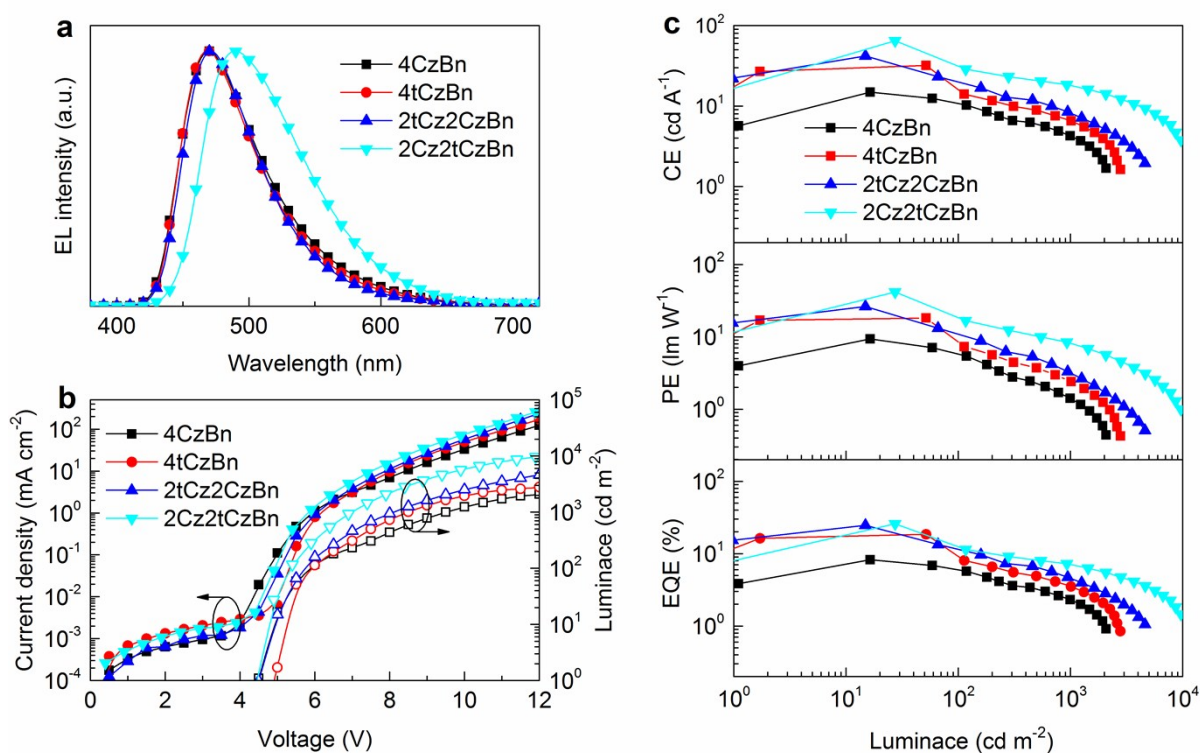

**Figure S26.** (a) EL spectra, (b) current density (J)-voltage (V)-luminance (L) characteristics, and (c) efficiency versus luminance relationships of the nondoped devices.

Two molecules 4CzBn and 4tCzBn have been synthesized (see **Scheme S2**). The EQEs of non-doped devices with 4CzBn and 4tCzBn are 8.2% and 18.4%, respectively. These results fully prove that the tert-butyl substitution is the main factor for the suppressed ACQ.

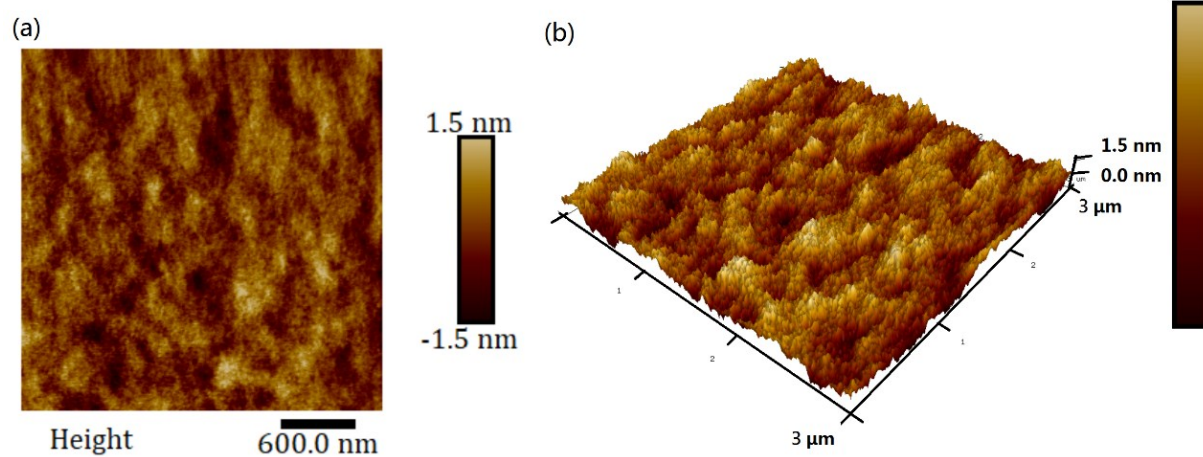

**Figure S27.** AFM images of solution-processed **2tCz2CzBn:3DMAC-BP** thin film on PVK substrate.



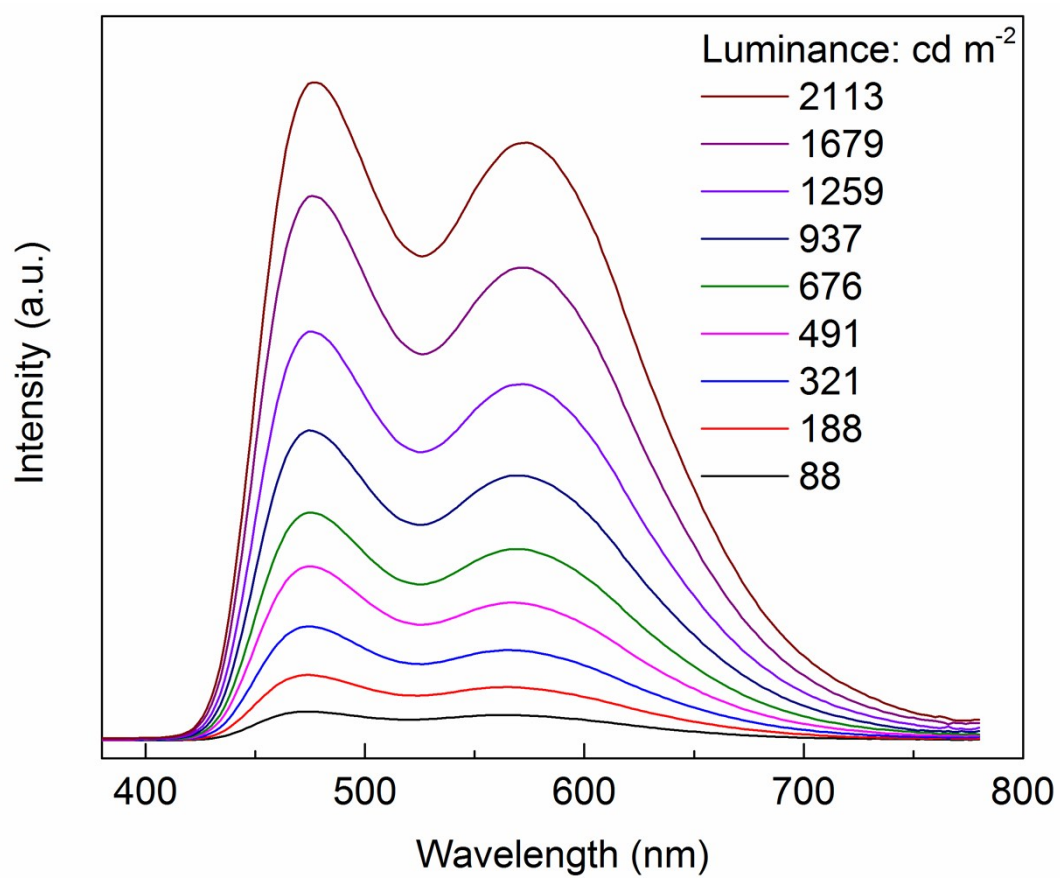

**Figure S28.** EL spectra of white OLED at different luminances.

**Table S2.** Comparison of the representative solution-processed white TADF emitters reported in the literature.

| <b>EML</b>                                                           | <b>CIE</b><br><b>(x, y)</b> | <b>CE<sub>max</sub></b><br><b>[cd A<sup>-1</sup>]</b> | <b>PE<sub>max</sub></b><br><b>[lm W<sup>-1</sup>]</b> | <b>EQE<sub>max</sub></b><br><b>[%]</b> | <b>Refs</b> |
|----------------------------------------------------------------------|-----------------------------|-------------------------------------------------------|-------------------------------------------------------|----------------------------------------|-------------|
| <b>2tCz2CzBn:3DMAC-BP</b>                                            | (0.34, 0.40)                | 67.0                                                  | 35.1                                                  | 27.3                                   | This work   |
| <b>DMAC-TRZ:Ir(dpm)PQ<sub>2</sub>:PO-01-TB</b>                       | (0.35, 0.44)                | 48.7                                                  | 44.5                                                  | 17.4                                   | 39          |
| <b>PDTPT-1</b>                                                       | (0.31, 0.39)                | 38.8                                                  | 20.3                                                  | 14.2                                   | 40          |
| <b>DCzDCN:SimCP2:TXO-TPA</b>                                         | (0.35, 0.39)                | 36.50                                                 | 37.31                                                 | 13.39                                  | 41          |
| <b>tBuCN-Flpic-mCP:(m-<br/>CF<sub>3</sub>DPQ)<sub>2</sub>Ir(pic)</b> | (0.35, 0.35)                | 43.5                                                  | 15.7                                                  | 20.6                                   | 5           |
| <b>G2:Ir(bt)<sub>2</sub>(acac)</b>                                   | (0.32, 0.33)                | 17.69                                                 | 7.88                                                  | 10.1                                   | 41          |
